# Supplementary material for: Application of a low molecular weight antifungal protein from Penicillium chrysogenum (PAF) to treat pulmonary aspergillosis in mice
Source: PubMed Central journal article supplement (PMC5148020; doi:10.1038/emi.2016.116), 2016-11-09
Supplement: emi2016116x1.pdf [file emi2016116x1.pdf]

## Mortality after *Aspergillus* infection

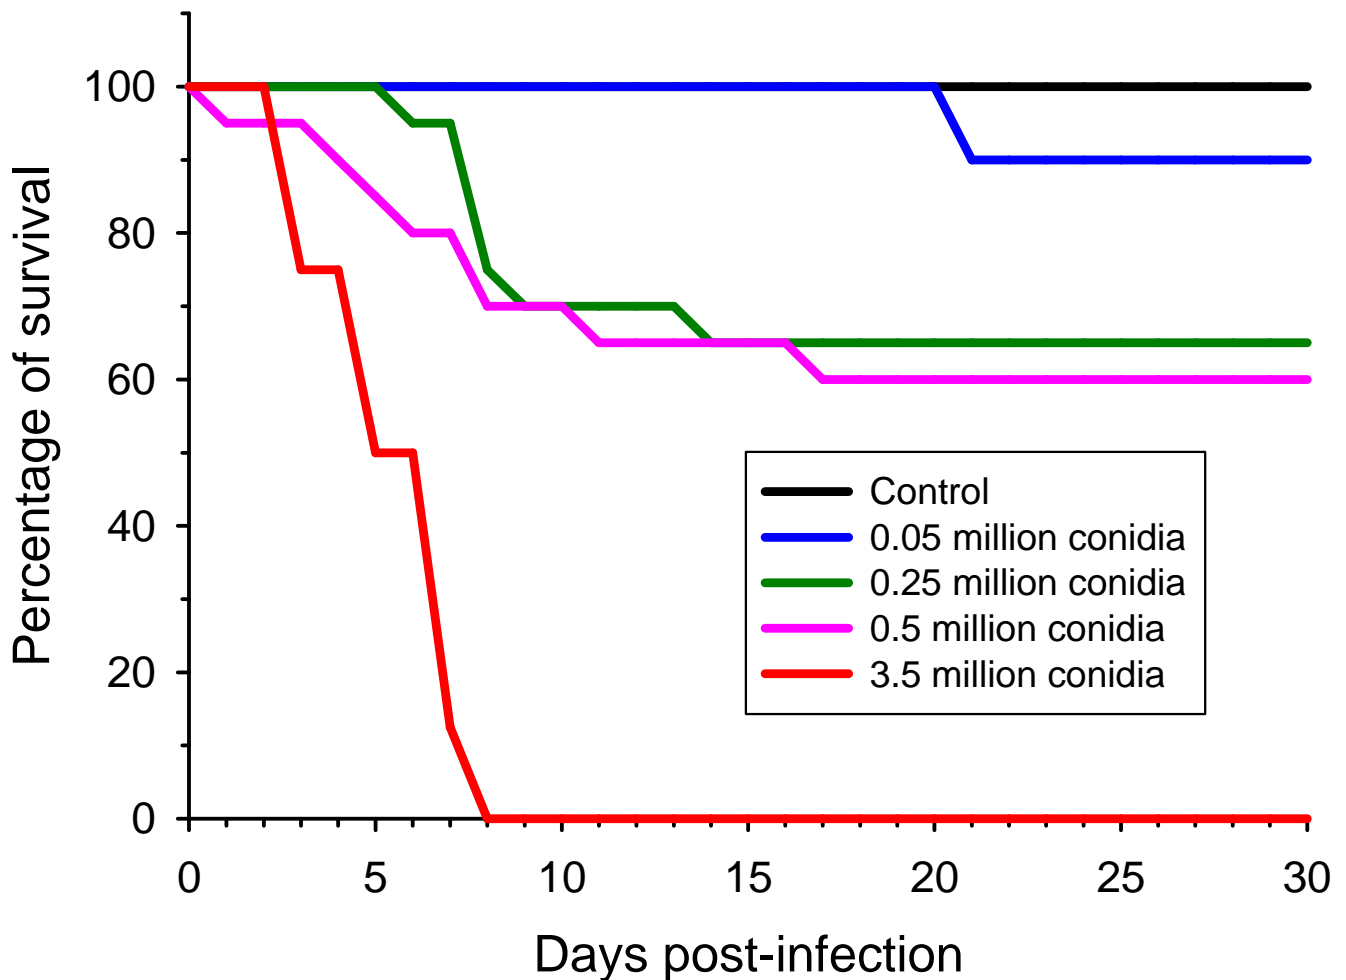

*Supplementary figure 1. The dependence of mortality on the number of *Aspergillus* conidia*

Immunosuppressed mice were randomly divided into five groups (20 mice per group). Animals in four groups were *Aspergillus* conidia infected, the non-infected group was the control. The number of conidia was  $5 \cdot 10^4$ ,  $2.5 \cdot 10^5$ ,  $5 \cdot 10^5$ , and  $3.5 \cdot 10^6$ . The survival of the animals were monitored 30 days after infection.
